# Supplementary material for: Isolation and characterization of alternatively spliced variants of the mouse sigma1 receptor gene, Sigmar1
Source: PubMed Central journal article supplement (PMC5370144; doi:10.1371/journal.pone.0174694), 2017-03-28
Supplement: pone.0174694.s001.pdf [file pone.0174694.s001.pdf]

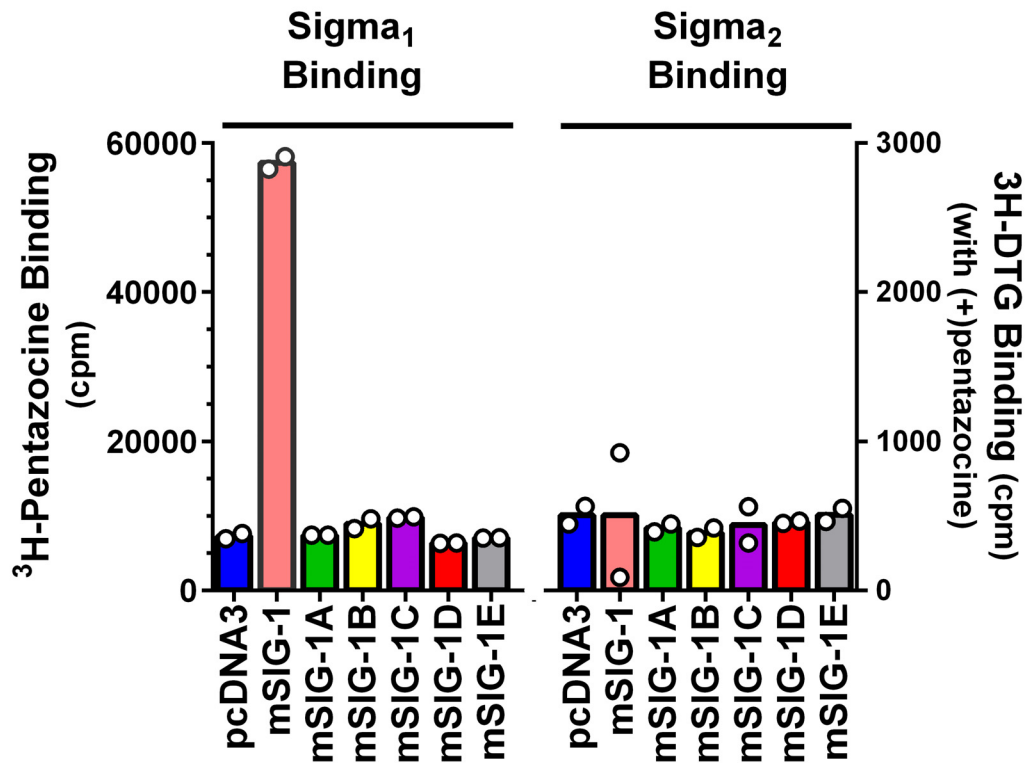

S1 Figure. [<sup>3</sup>H](+)-Pentazocine and [<sup>3</sup>H]DTGT binding on membranes from HEK293 cells transiently transfected with the mouse Sigmar1 variants.

[<sup>3</sup>H](+)-Pentazocine and [<sup>3</sup>H]DTGT binding were performed for sigma<sub>1</sub> and sigma<sub>2</sub> binding, respectively, as described in Materials and Methods. Briefly, membranes were isolated from HEK293 cells transiently transfected indicated Sigmar1 variant constructs or pcDNA3 vector, and used in [<sup>3</sup>H](+)-Pentazocine (~1 nM) and [<sup>3</sup>H]DTGT binding (~1 nM) in the absence or presence of 1 μM haloperidol to define specific binding. In [<sup>3</sup>H]DTGT binding, 1 μM nonradioisotope-labeled (+)-Pentazocine was also included to block sigma<sub>1</sub> binding. The results were from two independent samples in one experiment.
