# Supplementary material for: Isolation and characterization of alternatively spliced variants of the mouse sigma1 receptor gene, Sigmar1
Source: PubMed Central journal article supplement (PMC5370144; doi:10.1371/journal.pone.0174694), 2017-03-28
Supplement: pone.0174694.s003.pdf [file pone.0174694.s003.pdf]

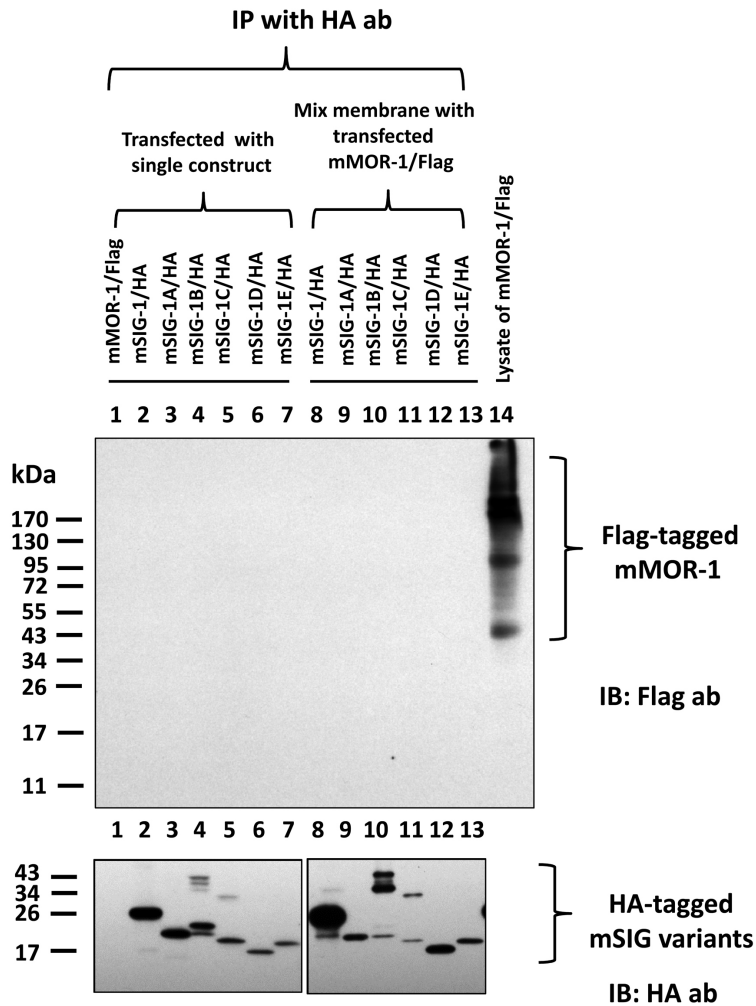

S3 Figure. Co-immunoprecipitation study.

Top panel: Co-IP study. Co-IP was performed using the membranes from HEK293 cells transfected with single tagged constructs (Lines 1 – 7) or the same membranes from Line 2 – 7 mixed with membranes from HEK293 cells transfected with Flag-tagged mMOR-1 construct (Lines 8 – 13). EZview Red Anti-HA Affinity Gel was used in immunoprecipitation (IP). HA peptide-eluted proteins were used in immunoblot (IB) with anti-Flag antibody. Line 14: lysate from HEK293 cells transfected with mMOR-1/Flag without IP. Bottom panel: The same eluted samples were used in IB with anti-HA antibody. The results were from one experiment.
